# Supplementary material for: Reverse Methanogenesis and Respiration in Methanotrophic Archaea
Source: Hindawi journal article supplement (doi:10.1155/2017/1654237), 2017-01-01
Supplement: f1 [file 1654237.f1.pdf]

**Table S1:** Domain based (meta)genome comparison of selected metagenomes of methanotrophs and genomes of selected methanogens\*

|                                                                         | Interpro ID | ANME-1-s | ANME-1-m | ANME-2a | ANME-2d-h | ANME-2d-a | AM | A  | M-1 | M-2 | M-3 | H-1 | H-2 | H-3 | H-4 | S  |
|-------------------------------------------------------------------------|-------------|----------|----------|---------|-----------|-----------|----|----|-----|-----|-----|-----|-----|-----|-----|----|
| <b>Dissimilatory sulfate reduction</b>                                  |             |          |          |         |           |           |    |    |     |     |     |     |     |     |     |    |
| Sulphate adenylyltransferase, small subunit                             | IPR011784   | 0        | 0        | 0       | 0         | 0         | 0  | 0  | 0   | 1   | 0   | 0   | 0   | 0   | 1   | 0  |
| Sulphate adenylyltransferase, large subunit (Sat)                       | IPR011779   | 0        | 0        | 0       | 1         | 0         | 0  | 0  | 0   | 1   | 0   | 0   | 0   | 0   | 1   | 0  |
| Sulphate adenylyltransferase catalytic domain (Sat)                     | IPR024951   | 1        | 0        | 0       | 1         | 1         | 0  | 0  | 0   | 0   | 1   | 0   | 0   | 0   | 0   | 1  |
| Sulphate adenylyltransferase (Sat)                                      | IPR002650   | 0        | 0        | 0       | 1         | 1         | 0  | 0  | 0   | 0   | 1   | 0   | 0   | 0   | 0   | 1  |
| Phosphoadenosine phosphosulphate/adenosine 5'-phosphosulphate reductase | IPR004511   | 0        | 0        | 0       | 1         | 1         | 0  | 0  | 0   | 1   | 1   | 0   | 0   | 0   | 0   | 0  |
| Adenosine 5'-phosphosulphate reductase                                  | IPR011798   | 0        | 0        | 0       | 1         | 1         | 0  | 0  | 0   | 1   | 1   | 0   | 0   | 0   | 0   | 0  |
| Phosphoadenosine phosphosulphate reductase                              | IPR002500   | 4        | 1        | 2       | 4         | 3         | 2  | 1  | 2   | 4   | 3   | 2   | 0   | 4   | 3   | 0  |
| Phosphoadenosine phosphosulphate/adenosine 5'-phosphosulphate reductase | IPR004511   | 0        | 0        | 0       | 1         | 1         | 0  | 0  | 0   | 1   | 1   | 0   | 0   | 0   | 0   | 0  |
| Adenylylsulphate reductase, alpha subunit (Apr)                         | IPR011803   | 0        | 0        | 0       | 0         | 0         | 0  | 0  | 0   | 0   | 0   | 0   | 0   | 0   | 0   | 1  |
| Adenylylsulphate reductase, beta subunit (Apr)                          | IPR011802   | 1        | 0        | 0       | 0         | 0         | 0  | 0  | 0   | 0   | 0   | 0   | 0   | 0   | 0   | 1  |
| Adenylylsulphate reductase, beta subunit, C-terminal (Apr)              | IPR022738   | 1        | 0        | 0       | 0         | 0         | 0  | 0  | 0   | 0   | 0   | 0   | 0   | 0   | 0   | 1  |
| Sulphite reductase, dissimilatory-type alpha subunit (Dsr)              | IPR011806   | 0        | 0        | 0       | 0         | 0         | 0  | 0  | 0   | 0   | 0   | 0   | 0   | 0   | 0   | 1  |
| Sulphite reductase, dissimilatory-type beta subunit (Dsr)               | IPR011808   | 0        | 0        | 0       | 0         | 0         | 0  | 0  | 0   | 0   | 0   | 0   | 0   | 0   | 0   | 1  |
| Dissimilatory sulphite reductase D                                      | IPR014793   | 0        | 0        | 0       | 0         | 0         | 0  | 0  | 0   | 0   | 0   | 0   | 0   | 0   | 0   | 1  |
| Sulphur relay, DsrE/F-like protein                                      | IPR003787   | 4        | 1        | 3       | 8         | 9         | 4  | 2  | 0   | 1   | 0   | 0   | 3   | 3   | 3   | 3  |
| <b>Assimilatory sulfate reduction</b>                                   |             |          |          |         |           |           |    |    |     |     |     |     |     |     |     |    |
| SLC26A/SuIP transporter                                                 | IPR001902   | 0        | 1        | 0       | 0         | 0         | 0  | 0  | 0   | 0   | 0   | 0   | 1   | 1   | 0   | 0  |
| ATP-sulfurylase PUA-like domain                                         | IPR025980   | 0        | 0        | 0       | 1         | 1         | 0  | 0  | 0   | 0   | 1   | 0   | 0   | 0   | 0   | 1  |
| PUA-like domain                                                         | IPR015947   | 30       | 12       | 12      | 14        | 13        | 15 | 11 | 16  | 20  | 13  | 13  | 10  | 13  | 11  | 15 |
| Adenosine specific kinase                                               | IPR007153   | 9        | 6        | 0       | 3         | 3         | 0  | 3  | 0   | 0   | 0   | 0   | 3   | 0   | 3   | 3  |
| Adenylyl-sulfate kinase                                                 | IPR002891   | 8        | 1        | 0       | 1         | 1         | 0  | 1  | 0   | 0   | 0   | 0   | 0   | 0   | 2   | 2  |
| Sodium/sulphate symporter, conserved site                               | IPR031312   | 0        | 0        | 1       | 1         | 2         | 0  | 1  | 0   | 0   | 0   | 1   | 0   | 0   | 0   | 0  |
| Sodium/sulphate symporter                                               | IPR001898   | 11       | 0        | 2       | 2         | 5         | 0  | 0  | 0   | 0   | 0   | 2   | 4   | 0   | 0   | 0  |
| Nitrite/sulphite reductase iron-sulphur/sirohaem-binding site           | IPR006066   | 9        | 3        | 5       | 1         | 8         | 12 | 5  | 11  | 6   | 11  | 5   | 5   | 0   | 8   | 1  |
| Nitrite/sulphite reductase 4Fe-4S domain                                | IPR006067   | 7        | 1        | 3       | 3         | 4         | 4  | 2  | 4   | 2   | 4   | 2   | 2   | 0   | 4   | 3  |
| Nitrite/Sulfite reductase ferredoxin-like domain                        | IPR005117   | 16       | 3        | 7       | 8         | 10        | 9  | 4  | 10  | 4   | 8   | 5   | 4   | 0   | 7   | 9  |
| Thiosulphate sulfurtransferase, conserved site                          | IPR001307   | 3        | 3        | 0       | 1         | 1         | 0  | 1  | 0   | 0   | 2   | 0   | 1   | 0   | 0   | 0  |

**Table S1 (continued):** Domain based (meta)genome comparison of selected metagenomes of methanotrophs and genomes of selected methanogens\*

|                                                                                              | ANME-1-s  | ANME-1-m | ANME-2a | ANME-2d-h | ANME-2d-a | AM | A  | M-1 | M-2 | M-3 | H-1 | H-2 | H-3 | H-4 | S  |
|----------------------------------------------------------------------------------------------|-----------|----------|---------|-----------|-----------|----|----|-----|-----|-----|-----|-----|-----|-----|----|
| <b>Heme-copper oxidase subunit II</b>                                                        |           |          |         |           |           |    |    |     |     |     |     |     |     |     |    |
| Multicopper oxidase, type 1                                                                  | IPR001117 | 0        | 0       | 0         | 2         | 2  | 0  | 0   | 0   | 0   | 0   | 0   | 0   | 0   | 0  |
| Multicopper oxidase, type 2                                                                  | IPR011706 | 0        | 0       | 0         | 2         | 3  | 0  | 0   | 0   | 0   | 0   | 0   | 0   | 0   | 0  |
| Multicopper oxidase, type 3                                                                  | IPR011707 | 0        | 0       | 0         | 2         | 1  | 0  | 0   | 0   | 0   | 0   | 0   | 0   | 0   | 0  |
| Multicopper oxidase, copper-binding site                                                     | IPR002355 | 0        | 0       | 0         | 2         | 1  | 0  | 0   | 0   | 0   | 0   | 0   | 0   | 0   | 0  |
| Multicopper oxidases, conserved site                                                         | IPR033138 | 0        | 0       | 0         | 1         | 1  | 0  | 0   | 0   | 0   | 0   | 0   | 0   | 0   | 0  |
| Copper centre Cu(A), identified in cytochrome c oxidase and nitrous oxide reductase          | IPR001505 | 0        | 0       | 0         | 2         | 2  | 0  | 0   | 0   | 0   | 0   | 0   | 0   | 0   | 2  |
| EfeO-type cupredoxin-like domain, iron uptake system                                         | IPR028096 | 0        | 0       | 0         | 6         | 7  | 5  | 0   | 0   | 0   | 1   | 0   | 0   | 0   | 2  |
| Multi-domain cupredoxins, periplasmic domain of cytochrome c oxidase subunit II              | IPR008972 | 2        | 2       | 6         | 43        | 45 | 18 | 0   | 2   | 6   | 8   | 0   | 2   | 2   | 6  |
| <b>Nitrate reduction</b>                                                                     |           |          |         |           |           |    |    |     |     |     |     |     |     |     |    |
| Flavoprotein pyridine nucleotide cytochrome reductase                                        | IPR001709 | 0        | 0       | 0         | 10        | 0  | 0  | 0   | 0   | 4   | 0   | 0   | 0   | 0   | 0  |
| Rieske iron-sulphur protein, C-terminal                                                      | IPR005805 | 0        | 0       | 0         | 6         | 6  | 3  | 0   | 0   | 0   | 0   | 0   | 0   | 0   | 0  |
| Rieske [2Fe-2S] iron-sulphur domain                                                          | IPR017941 | 3        | 0       | 0         | 13        | 6  | 6  | 0   | 3   | 12  | 0   | 0   | 3   | 0   | 0  |
| Cytochrome c nitrite reductase, small subunit (NrfH)                                         | IPR017571 | 0        | 0       | 0         | 2         | 1  | 0  | 0   | 0   | 0   | 0   | 0   | 0   | 0   | 0  |
| NapC/NirT cytochrome c, N-terminal                                                           | IPR005126 | 0        | 1       | 0         | 3         | 3  | 0  | 0   | 0   | 0   | 0   | 0   | 0   | 0   | 0  |
| Cytochrome c552 (NrfA)                                                                       | IPR003321 | 0        | 0       | 0         | 3         | 3  | 0  | 0   | 1   | 1   | 0   | 0   | 0   | 0   | 0  |
| Cytochrome cd1-nitrite reductase-like, haem d1 domain                                        | IPR011048 | 2        | 1       | 0         | 2         | 0  | 2  | 0   | 1   | 0   | 0   | 0   | 1   | 0   | 0  |
| DMSO/Nitrate reductase chaperone, NarJ                                                       | IPR020945 | 6        | 3       | 0         | 9         | 9  | 0  | 0   | 0   | 0   | 0   | 0   | 0   | 0   | 6  |
| NarG-like domain                                                                             | IPR023234 | 6        | 0       | 2         | 5         | 7  | 3  | 2   | 2   | 3   | 2   | 0   | 0   | 0   | 12 |
| Periplasmic nitrate reductase NapB subunit, heme binding domain                              | IPR027406 | 0        | 0       | 0         | 1         | 0  | 0  | 0   | 0   | 1   | 0   | 0   | 0   | 0   | 0  |
| Respiratory nitrate reductase beta, C-terminal                                               | IPR029263 | 0        | 0       | 0         | 0         | 2  | 0  | 0   | 0   | 0   | 0   | 0   | 0   | 0   | 0  |
| Nitrate reductase chaperone, NarJ                                                            | IPR003765 | 0        | 0       | 0         | 0         | 1  | 0  | 0   | 0   | 0   | 0   | 0   | 0   | 0   | 0  |
| Nitrate reductase, gamma subunit                                                             | IPR003816 | 0        | 0       | 0         | 0         | 1  | 0  | 0   | 0   | 0   | 0   | 0   | 0   | 0   | 0  |
| Nitrate reductase, alpha subunit                                                             | IPR006468 | 0        | 0       | 0         | 0         | 1  | 0  | 0   | 0   | 0   | 0   | 0   | 0   | 0   | 0  |
| Nitrate reductase, beta subunit                                                              | IPR006547 | 0        | 0       | 0         | 0         | 1  | 0  | 0   | 0   | 0   | 0   | 0   | 0   | 0   | 0  |
| DMSO/Nitrate reductase chaperone                                                             | IPR020945 | 6        | 3       | 0         | 9         | 9  | 0  | 0   | 0   | 0   | 0   | 0   | 0   | 0   | 6  |
| Nitrite reductase [NAD(P)H] small subunit, NirD                                              | IPR012748 | 1        | 0       | 0         | 0         | 0  | 0  | 0   | 0   | 0   | 0   | 0   | 0   | 0   | 0  |
| CbbQ/NirQ/NorQ, C-terminal                                                                   | IPR013615 | 2        | 2       | 0         | 0         | 0  | 0  | 0   | 0   | 1   | 1   | 0   | 0   | 0   | 0  |
| Cytochrome c-552/DMSO reductase-like, haem-binding domain                                    | IPR019020 | 0        | 0       | 0         | 4         | 6  | 0  | 0   | 0   | 0   | 0   | 0   | 0   | 0   | 0  |
| Copper centre Cu(A), has been identified in cytochrome c oxidase and nitrous oxide reductase | IPR001505 | 0        | 0       | 0         | 2         | 2  | 0  | 0   | 0   | 0   | 0   | 0   | 0   | 0   | 2  |
| Cytochrome c-552/4, tetra-heme cytochrome                                                    | IPR023155 | 11       | 2       | 17        | 22        | 20 | 2  | 0   | 6   | 3   | 16  | 0   | 0   | 0   | 3  |
| Heme b synthase (heme D1)                                                                    | IPR030896 | 0        | 0       | 1         | 1         | 1  | 0  | 1   | 1   | 1   | 0   | 0   | 0   | 0   | 0  |
| Siroheme synthase, central domain (for nitrite reductase)                                    | IPR028281 | 0        | 0       | 1         | 0         | 1  | 0  | 0   | 1   | 0   | 0   | 0   | 0   | 1   | 0  |
| Sirohaem synthase, N-terminal (for nitrite reductase)                                        | IPR006367 | 9        | 0       | 2         | 2         | 2  | 2  | 2   | 3   | 2   | 2   | 2   | 2   | 2   | 2  |
| 12,18-didecarboxysiroheme deacetylase                                                        | IPR030894 | 1        | 0       | 1         | 1         | 1  | 1  | 0   | 0   | 1   | 1   | 0   | 0   | 0   | 0  |

**Table S1** (continued): Domain based (meta)genome comparison of selected metagenomes of methanotrophs and genomes of selected methanogens\*

|                                                | ANME-1-s | ANME-1-m | ANME-2a | ANME-2d-h | ANME-2d-a | AM | A | M-1 | M-2 | M-3 | H-1 | H-2 | H-3 | H-4 | S |
|------------------------------------------------|----------|----------|---------|-----------|-----------|----|---|-----|-----|-----|-----|-----|-----|-----|---|
| NADH:cytochrome b5 reductase (CBR)             | 0        | 0        | 4       | 12        | 0         | 4  | 0 | 4   | 4   | 4   | 0   | 0   | 0   | 0   | 0 |
| Cytochrome b5-like heme/steroid binding domain | 3        | 0        | 0       | 6         | 0         | 3  | 0 | 3   | 3   | 3   | 0   | 0   | 0   | 0   | 0 |
| Cytochrome b/b6, C-terminal                    | 0        | 0        | 0       | 2         | 2         | 0  | 0 | 0   | 0   | 0   | 0   | 0   | 0   | 0   | 0 |
| Cytochrome b/b6-like domain                    | 0        | 0        | 0       | 2         | 2         | 0  | 0 | 0   | 0   | 0   | 0   | 0   | 0   | 0   | 0 |
| Cytochrome b/b6, N-terminal                    | 0        | 0        | 0       | 1         | 1         | 0  | 0 | 0   | 0   | 0   | 0   | 0   | 0   | 0   | 0 |

\* Domain abundance in every (meta)genome is indicated by numbers which are darkened according to abundance. S-AOM performing ANME include ANME-1-s [1], ANME-1-m [2], and ANME-2a [3]. N-AOM performing ANME include ANME-2d-h [4] and ANME-2d-a [5]. The acetoclastic (A) and methylotrophic (M) methanogens include *Methanosarcina acetivorans* C2A (AM), *Methanosaeta concilii* GP6 (A), *Methanococcoides burtonii* DSM6242 (M-1), *Methanolobus tindarius* DSM2278 (M-2), and *Methanohalophilus mahii* DSM5219 (M-3). Hydrogenotrophic methanogens (H) include *Methanospirillum hungatei* JF-1 (H-1), *Methanobacterium formicicum* DSM3637 (H-2), *Methanococcus maripaludis* C5 (H-3), and *Methanoregula formicica* SMSP (H-4). The sulfate-reducing archaeon (S) is *Archaeoglobus fulgidus* DSM 4304.

**Table S2:** Gene structure of the gene containing the Fae domain found in the metagenomes of ANME-1 [1, 2]\*

| Meyerdierks et al.,2010 |                     |                                             |
|-------------------------|---------------------|---------------------------------------------|
| Gene position           | Interpro identifier |                                             |
| 1996565-1995378         | IPR013785           | Aldolase-type TIM barrel                    |
|                         | IPR011060           | Ribulose-phosphate binding barrel           |
|                         | IPR014826           | Formaldehyde-activating enzyme              |
|                         | IPR001754           | Orotidine 5'-phosphate decarboxylase domain |
|                         | IPR014826           | Formaldehyde-activating enzyme              |
|                         | IPR020568           | Ribosomal protein S5 domain 2-type fold     |
|                         | IPR014826           | Formaldehyde-activating enzyme              |
| Stokke et al.,2012      |                     |                                             |
| Gene position           | Interpro identifier |                                             |
| 18911-1996565           | IPR013785           | Aldolase-type TIM barrel                    |
|                         | IPR011060           | Ribulose-phosphate binding barrel           |
|                         | IPR014826           | Formaldehyde-activating enzyme              |
|                         | IPR001754           | Orotidine 5'-phosphate decarboxylase domain |
|                         | IPR014826           | Formaldehyde-activating enzyme              |
|                         | IPR020568           | Ribosomal protein S5 domain 2-type fold     |
|                         | IPR014826           | Formaldehyde-activating enzyme              |

\*The position of the genes corresponds to the position on the contig where the specific domains were found.

**Table S3:** Gene structure of the iron hydrogenase gene found in the metagenomes of ANME-1 (gene 1) and the surrounding genes (gene 2 and gene 3)\*

| Meyerdierks et al., 2010 | Gene position | Interpro identifier                                             |                                                                            |
|--------------------------|---------------|-----------------------------------------------------------------|----------------------------------------------------------------------------|
| <b>Gene 1</b>            | 925906-927615 | IPR003149                                                       | Iron hydrogenase, small subunit                                            |
|                          |               | IPR019574                                                       | NADH:ubiquinone oxidoreductase, subunit G, iron-sulphur binding            |
|                          |               | IPR009016                                                       | Iron hydrogenase                                                           |
|                          |               | IPR013352                                                       | Iron hydrogenase, subset                                                   |
|                          |               | IPR001041                                                       | 2Fe-2S ferredoxin-type iron-sulfur binding domain                          |
|                          |               | IPR017896                                                       | 4Fe-4S ferredoxin-type, iron-sulphur binding domain                        |
|                          |               | IPR000283                                                       | NADH:ubiquinone oxidoreductase, 75kDa subunit, conserved site              |
|                          |               | IPR003149                                                       | Iron hydrogenase, small subunit                                            |
|                          |               | IPR004108                                                       | Iron hydrogenase, large subunit, C-terminal                                |
|                          | IPR019574     | NADH:ubiquinone oxidoreductase, subunit G, iron-sulphur binding |                                                                            |
| <b>Gene 2</b>            | 927628-928404 | IPR011538                                                       | NADH-ubiquinone oxidoreductase 51 kDa subunit, FMN-binding domain          |
|                          |               | IPR019554                                                       | Soluble ligand binding domain                                              |
|                          |               | IPR019575                                                       | NADH-ubiquinone oxidoreductase 51 kDa subunit, iron-sulphur binding domain |
|                          |               | IPR001949                                                       | NADH:ubiquinone oxidoreductase, 51kDa subunit, conserved site              |
|                          |               | IPR019575                                                       | NADH-ubiquinone oxidoreductase 51 kDa subunit, iron-sulphur binding domain |
| <b>Gene 3</b>            | 928501-928854 | IPR011538                                                       | NADH-ubiquinone oxidoreductase 51 kDa subunit, FMN-binding domain          |
|                          |               | IPR002023                                                       | NADH-quinone oxidoreductase subunit E-like                                 |
|                          |               | IPR012336                                                       | Thioredoxin-like fold                                                      |

\* The position of the genes corresponds to the position on the contig where the specific domains were found.

**Table S3** (continued): Gene structure of the iron hydrogenase gene found in the metagenomes of ANME-1 (gene 1) and the surrounding genes (gene 2 and gene 3)\*

| Stokke et al., 2012 | Gene position                               | Interpro identifier |                                                                            |
|---------------------|---------------------------------------------|---------------------|----------------------------------------------------------------------------|
| <b>Gene 1</b>       | 927615-925906                               | IPR003149           | Iron hydrogenase small subunit                                             |
|                     |                                             | IPR019574           | NADH:ubiquinone oxidoreductase, subunit G, iron-sulphur binding            |
|                     |                                             | IPR009016           | Iron hydrogenase                                                           |
|                     |                                             | IPR013352           | Iron hydrogenase, subset                                                   |
|                     |                                             | IPR001041           | 2Fe-2S ferredoxin-type iron-sulfur binding domain                          |
|                     |                                             | IPR017896           | 4Fe-4S ferredoxin-type, iron-sulphur binding domain                        |
|                     |                                             | IPR017900           | 4Fe-4S ferredoxin, iron-sulphur binding, conserved site                    |
|                     |                                             | IPR012675           | Beta-grasp domain                                                          |
|                     |                                             | IPR000283           | NADH:ubiquinone oxidoreductase, 75kDa subunit, conserved site              |
|                     |                                             | IPR003149           | Iron hydrogenase, small subunit                                            |
| IPR004108           | Iron hydrogenase, large subunit, C-terminal |                     |                                                                            |
| <b>Gene 2</b>       | 928404-927628                               | IPR011538           | NADH-ubiquinone oxidoreductase 51 kDa subunit, FMN-binding domain          |
|                     |                                             | IPR019554           | Soluble ligand binding domain                                              |
|                     |                                             | IPR019575           | NADH-ubiquinone oxidoreductase 51 kDa subunit, iron-sulphur binding domain |
|                     |                                             | IPR001949           | NADH:ubiquinone oxidoreductase, 51kDa subunit, conserved site              |
| <b>Gene 3</b>       | 928854-928501                               | IPR011538           | NADH-ubiquinone oxidoreductase 51 kDa subunit, FMN-binding domain          |
|                     |                                             | IPR002023           | NADH-quinone oxidoreductase subunit E-like                                 |
|                     |                                             | IPR002023           | NADH-quinone oxidoreductase subunit E-like                                 |
|                     |                                             | IPR012336           | Thioredoxin-like fold                                                      |

\*The position of the genes corresponds to the position on the contig where the specific domains were found.

## References

1. Stokke, R., et al., *Integrated metagenomic and metaproteomic analyses of an ANME-1-dominated community in marine cold seep sediments*. Environ Microbiol, 2012. **14**(5): p. 1333-1346.
2. Meyerdierks, A., et al., *Metagenome and mRNA expression analyses of anaerobic methanotrophic archaea of the ANME-1 group*. Environ Microbiol, 2010. **12**(2): p. 422-439.
3. Wang, F.P., et al., *Methanotrophic archaea possessing diverging methane-oxidizing and electron-transporting pathways*. ISME J, 2014. **8**(5): p. 1069-1078.
4. Haroon, M.F., et al., *Anaerobic oxidation of methane coupled to nitrate reduction in a novel archaeal lineage*. Nature, 2013. **500**(7468): p. 567-570.
5. Arshad, A., et al., *A metagenomics-based metabolic model of nitrate-dependent anaerobic oxidation of methane by Methanoperedens-like archaea*. Front Microbiol, 2015. **6**: p. 1423, doi: 10.3389/fmicb.2015.01423.
